# Supplementary material for: Ionic-covalent entanglement hydrogels from gellan gum, carrageenan and an epoxy-amine
Source: Royal Society of Chemistry journal article supplement (doi:10.1039/c3sm27413f), 2013-01-01
Supplement: c3sm27413f.pdf [file c3sm27413f.pdf]

## Electronic Supporting Information for

# Ionic-covalent entanglement hydrogels from gellan gum, carrageenan and an epoxy-amine

Leo Stevens,<sup>a,b</sup> Paul Calvert,<sup>c</sup> Gordon G. Wallace,<sup>b</sup> and Marc in het Panhuis<sup>a,b\*</sup>

<sup>a</sup> *Soft Materials Group, School of Chemistry, University of Wollongong, Wollongong, NSW 2522, Australia.*

<sup>b</sup> *Intelligent Polymer Research Institute, ARC Centre of Excellence for Electromaterials Science, AIIM Facility, University of Wollongong, Wollongong, NSW 2522, Australia.*

<sup>c</sup> *Department of Bioengineering, University of Massachusetts Dartmouth, North Dartmouth, MA, 02747, USA\**

Corresponding author e-mail: panhuis@uow.edu.au

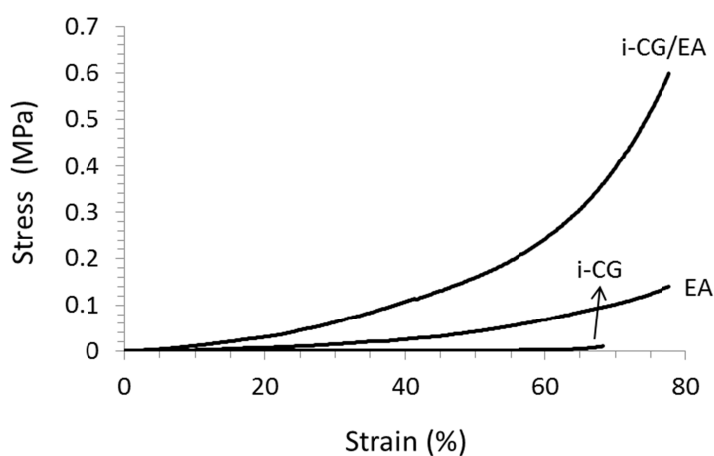

**Fig. S1.** Typical compressive stress-strain curves of iota-carrageenan (i-CG), epoxy-amine (EA) and i-CG/EA ICE hydrogels.

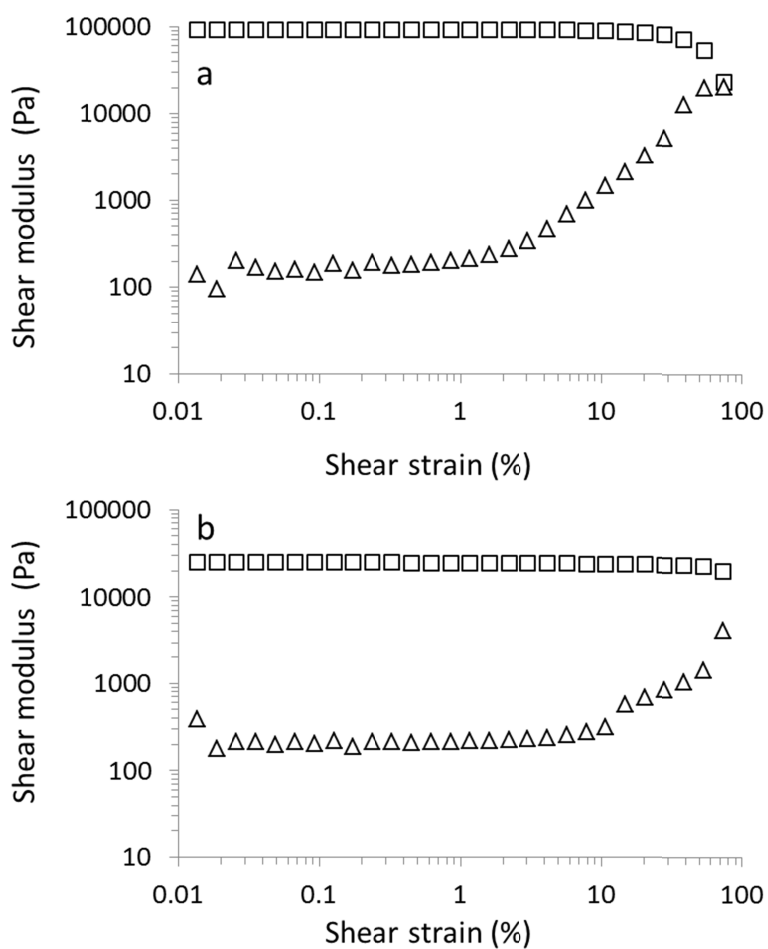

**Fig S2.** Typical amplitude sweeps of (a) iota-carrageenan/epoxy-amine and (b) gellan gum/epoxy-amine ICE hydrogels. Storage and loss moduli are indicated by squares and triangles, respectively.

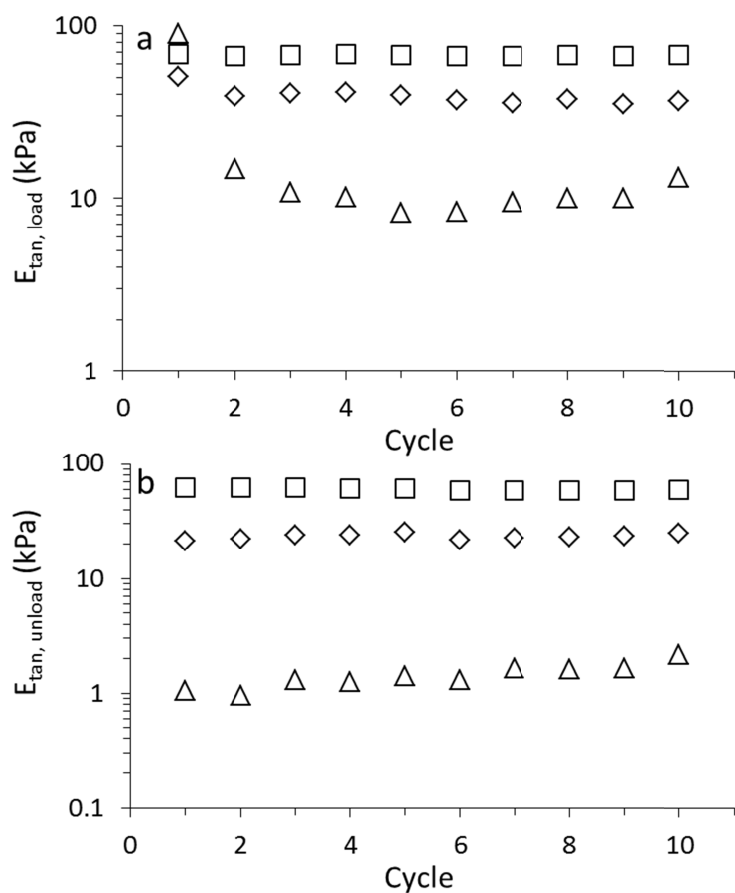

**Fig. S3.** Typical tangent moduli (20-30% strain) calculated using the (a) loading and (b) unloading parts of the cyclic testing regime for gellan gum (GG, triangles), epoxy amine (EA, squares) and GG/EA ICE (diamonds) hydrogels.
